# Supplementary material
Source: PubMed Central journal article supplement (PMC3924180)
Supplement: NIHMS552752-supplement-1_si_001.pdf [file NIHMS552752-supplement-1_si_001.pdf]

**Supplementary Information:**

**Ex Vivo Chemical Cytometric Analysis of Protein Tyrosine  
Phosphatase Activity in Single Human Airway Epithelial  
Cells**

Ryan M. Phillips<sup>a</sup>, Lisa A. Dailey<sup>b</sup>, Eric Bair<sup>c</sup>, James M. Samet<sup>b</sup>, and Nancy L. Allbritton<sup>a,d,e</sup>

<sup>a</sup>Department of Pharmacology, University of North Carolina, Chapel Hill, North Carolina 27599,  
USA

<sup>b</sup>Environmental Public Health Division, National Health and Environmental Effects Research  
Laboratory, U.S. Environmental Protection Agency, Research Triangle Park, North Carolina  
27711, USA

<sup>c</sup>Departments of Biostatistics and Endodontics, University of North Carolina, Chapel Hill, North  
Carolina, 27599, United States

<sup>d</sup>Department of Chemistry, University of North Carolina, Chapel Hill, North Carolina 27599,  
USA

<sup>e</sup>Department of Biomedical Engineering, University of North Carolina, Chapel Hill, North  
Carolina 27599, USA and North Carolina State University, Raleigh, North Carolina 27695, USA

\*Corresponding author e-mail: [nlallbri@unc.edu](mailto:nlallbri@unc.edu) and fax 919-962-2388

## Table of Contents

|                 |     |
|-----------------|-----|
| Figures .....   | S-1 |
| Figure S1 ..... | S-1 |

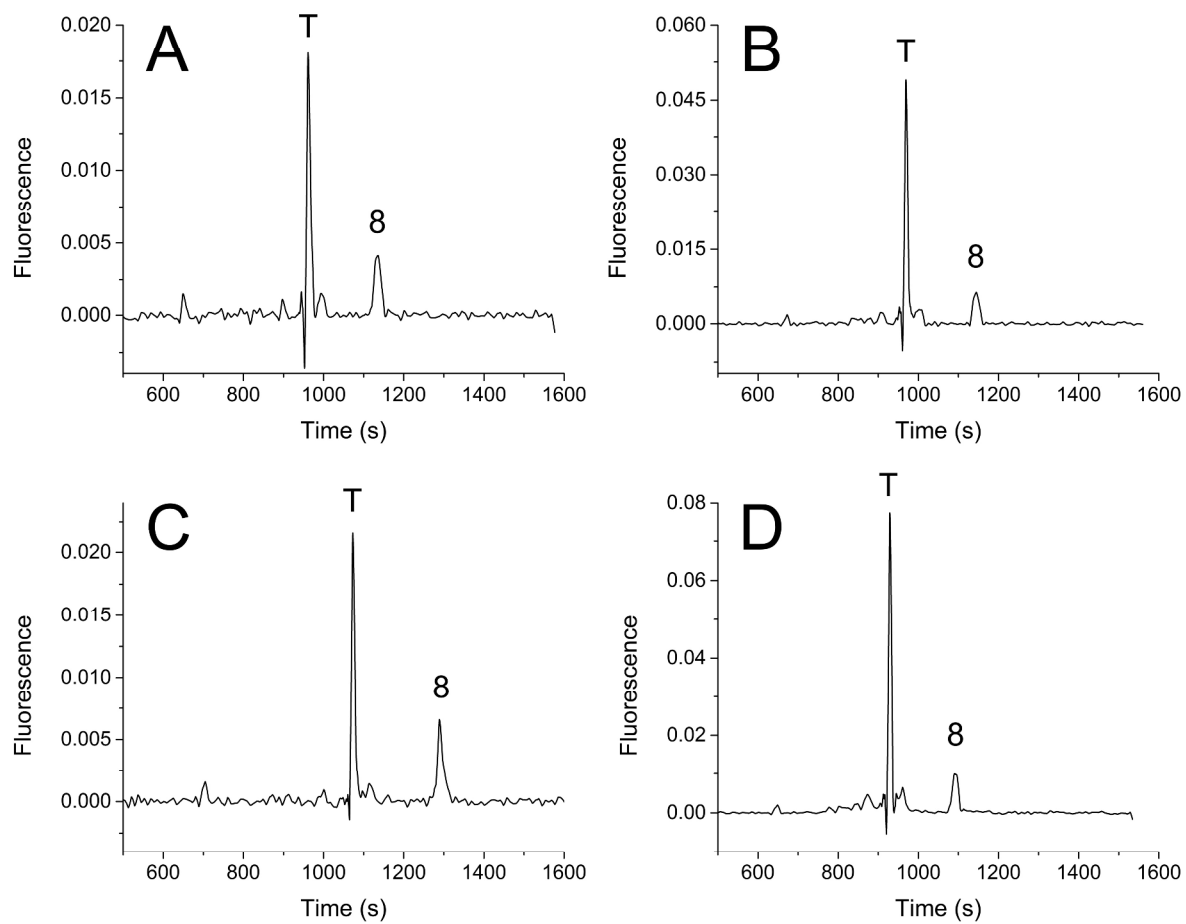

Figure S1. Fragmentation patterns for TS13 after incubation for (A) 3 h in A431 cell lysate or 5 min in a single (B) A431 cell, (C) BEAS-2B cell, (D) or primary hAEC. Peaks representing TS13 are labelled “T” while those representing the 8-residue fragment are labelled “8”.
